# Supplementary material for: The impact of sample preparation on the elemental composition of soft tissues assessed by laser ablation ICP-MS
Source: Royal Society of Chemistry journal article supplement (doi:10.1039/d0ja00115e), 2020-01-01
Supplement: d0ja00115e1.pdf [file d0ja00115e1.pdf]

**Table 1supp.** Results of quantitative ICP-MS elemental analysis of chicken liver tissue. Elemental content from three biological replicates was calculated with standard deviation (SD) and the statistically significant differences from ANOVA test were marked as in Table 2 in the main text

| Element | Category | ICP-MS (non-homogenized) |       |        |   | ICP-MS (homogenized) |       |        |   |
|---------|----------|--------------------------|-------|--------|---|----------------------|-------|--------|---|
|         |          | mg/kg                    | SD    | Groups |   | mg/kg                | SD    | Groups |   |
| Na      | RS       | 925                      | 39    | A      |   | 302                  | 14    | A      |   |
|         | OD       | 863                      | 35    | A      | B | 278                  | 13    |        | B |
|         | FD3      | 837                      | 38    |        | B | 286                  | 4     | A      | B |
|         | FD17     | 835                      | 41    |        | B | 280                  | 7     |        | B |
| Mg      | RS       | 199                      | 11    | A      |   | 204                  | 10    | A      |   |
|         | OD       | 180                      | 7     |        | B | 186                  | 11    |        | B |
|         | FD3      | 179                      | 7     |        | B | 197                  | 3     | A      | B |
|         | FD17     | 188                      | 10    | A      | B | 194                  | 5     | A      | B |
| K       | RS       | 2882                     | 150   | A      |   | 2026                 | 11    | A      |   |
|         | OD       | 2627                     | 127   |        | B | 1777                 | 86    |        | B |
|         | FD3      | 2552                     | 111   |        | B | 1973                 | 14    | A      |   |
|         | FD17     | 2708                     | 101   | A      | B | 1959                 | 36    | A      |   |
| Ca      | RS       | 190                      | 27    | A      |   | 39.7                 | 8.9   | A      |   |
|         | OD       | 151                      | 14    | A      |   | 42.4                 | 5.2   | A      |   |
|         | FD3      | 157                      | 26    | A      |   | 29.3                 | 1.3   |        | B |
|         | FD17     | 158                      | 24    | A      |   | 25.2                 | 3.0   |        | B |
| Mn      | RS       | 5.67                     | 0.43  | A      |   | 4.32                 | 0.49  | A      |   |
|         | OD       | 4.63                     | 0.31  |        | B | 3.47                 | 0.14  |        | B |
|         | FD3      | 4.80                     | 0.30  |        | B | 3.63                 | 0.10  |        | B |
|         | FD17     | 4.57                     | 0.33  |        | B | 3.59                 | 0.14  |        | B |
| Fe      | RS       | 166                      | 9     | A      |   | 71                   | 17    | A      |   |
|         | OD       | 154                      | 6     | A      |   | 100                  | 10    |        | B |
|         | FD3      | 160                      | 10    | A      |   | 112                  | 3     |        | B |
|         | FD17     | 160                      | 11    | A      |   | 113                  | 3     |        | B |
| Cu      | RS       | 4.90                     | 0.20  | A      |   | 5.33                 | 0.58  | A      |   |
|         | OD       | 3.99                     | 0.33  |        | B | 3.67                 | 0.11  |        | B |
|         | FD3      | 4.06                     | 0.09  |        | B | 4.43                 | 0.13  |        | C |
|         | FD17     | 4.02                     | 0.11  |        | B | 4.36                 | 0.16  |        | C |
| Zn      | RS       | 24.6                     | 3.1   | A      |   | 45.1                 | 2.0   | A      |   |
|         | OD       | 19.0                     | 1.4   |        | B | 26.8                 | 2.0   |        | B |
|         | FD3      | 19.4                     | 0.4   |        | B | 42.1                 | 0.8   |        | C |
|         | FD17     | 19.8                     | 0.6   |        | B | 40.8                 | 0.1   |        | C |
| Sr      | RS       | 0.201                    | 0.030 | A      |   | 0.172                | 0.021 | A      |   |
|         | OD       | 0.160                    | 0.021 | A      |   | 0.124                | 0.004 |        | B |
|         | FD3      | 0.175                    | 0.030 | A      |   | 0.135                | 0.005 |        | B |
|         | FD17     | 0.177                    | 0.030 | A      |   | 0.134                | 0.006 |        | B |
